# Supplementary material
Source: PubMed Central journal article supplement (PMC3633420)

SUPPORTING INFORMATION

**Structural Analysis of Aliphatic vs. Aromatic Substrate Specificity in a Copper Amine**

**Oxidase from *Hansenula polymorpha***

Valerie J. Klema, Corinne J. Solheid, Judith P. Klinman, and Carrie M. Wilmot

Table S1: Unit cell parameters for native-HPAO-1 and substrate-HPAO-1 complexes.

| structure          | space group | unit cell lengths (Å)                | $\beta$ angle (°) |
|--------------------|-------------|--------------------------------------|-------------------|
| native HPAO-1      | $P2_1$      | $a = 104.15, b = 223.08, c = 104.25$ | 95.77             |
| ethylamine-HPAO-1  | $P2_1$      | $a = 104.41, b = 232.83, c = 105.12$ | 96.66             |
| benzylamine-HPAO-1 | $P2_1$      | $a = 104.24, b = 233.71, c = 105.05$ | 96.57             |

Table S2: Species in the substrate-HPAO-1 active sites. A = axial copper ligand, E = equatorial copper ligand, \* = evidence of second overlapping binding site. Occupancies are listed in parentheses.

| Substrate   | Chain | Electronic form of cofactor | Chain | Copper ligands                                            | Chain | Species bound in active site |
|-------------|-------|-----------------------------|-------|-----------------------------------------------------------|-------|------------------------------|
| ethylamine  | all   | aminoquinol (1)             | A     | A = H <sub>2</sub> O <sub>2</sub>                         | A     | ethylamine (1)*              |
|             |       |                             | B     | A = H <sub>2</sub> O <sub>2</sub>                         | B     | ethylamine (1)               |
|             |       |                             | C     | A = H <sub>2</sub> O<br>E = H <sub>2</sub> O              | C     | ethylamine (1)*              |
|             |       |                             | D     | A = H <sub>2</sub> O                                      | D     | ethylamine (1)*              |
|             |       |                             | E     | A = H <sub>2</sub> O <sub>2</sub><br>E = H <sub>2</sub> O | E     | ethylamine (1)               |
|             |       |                             | F     | A = H <sub>2</sub> O <sub>2</sub>                         | F     | ethylamine (1)*              |
| benzylamine | all   | aminoquinol (1)             | A     | A = H <sub>2</sub> O <sub>2</sub>                         | all   | benzylamine (1)              |
|             |       |                             | B     | A = H <sub>2</sub> O <sub>2</sub>                         |       |                              |
|             |       |                             | C     | A = H <sub>2</sub> O<br>E = H <sub>2</sub> O              |       |                              |
|             |       |                             | D     | A = H <sub>2</sub> O                                      |       |                              |
|             |       |                             | E     | A = H <sub>2</sub> O <sub>2</sub>                         |       |                              |
|             |       |                             | F     | A = H <sub>2</sub> O <sub>2</sub>                         |       |                              |

Table S3: Average B-values for active site constituents.

| Active site constituent                      | Average B-value ( $\text{\AA}^2$ ) |                     |
|----------------------------------------------|------------------------------------|---------------------|
|                                              | ethylamine complex                 | benzylamine complex |
| Copper ions                                  | 23.3                               | 30.8                |
| H <sub>2</sub> O copper ligands              | 41.3                               | 29.4                |
| H <sub>2</sub> O <sub>2</sub> copper ligands | 22.0                               | 30.2                |
| ethylamine                                   | 35.2                               | --                  |
| benzylamine                                  | --                                 | 38.0                |

**Figure S1:** Domain organization in HPAO-1. One monomer is drawn in cartoon and colored by domain (D2, purple; D3, green; D4, blue; connecting loops, yellow;  $\beta$ -hairpin arms, red). The second monomer is drawn as a semi-transparent surface rendering. TPQ atoms are drawn as space-filling spheres and colored by atom type (carbon, white), and copper ions are drawn as gold spheres.

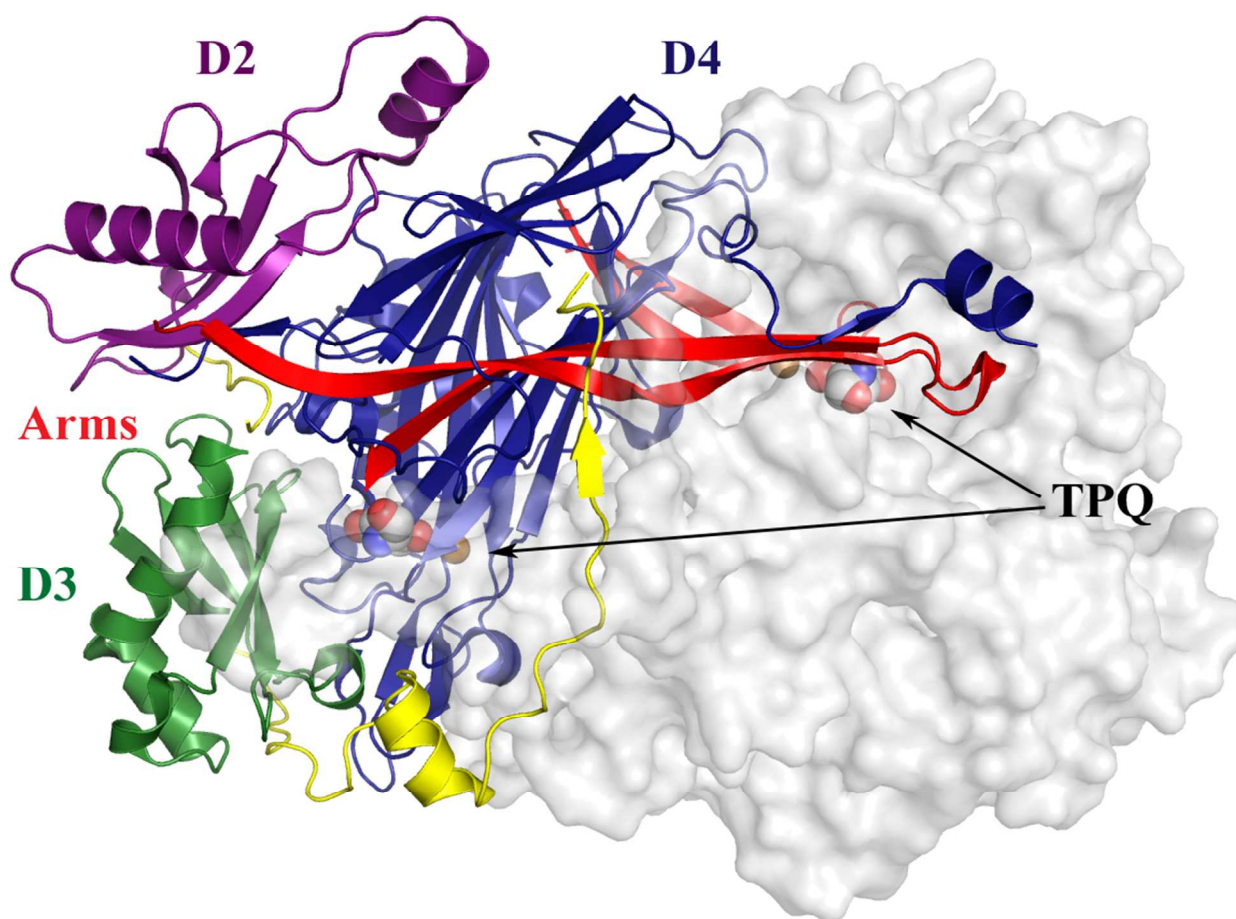

**Figure S2:** Electron density suggesting an alternate ethylamine conformer. Peaks in the  $F_o-F_c$  map near the site of ethylamine binding in all polypeptide chains in the EtAm-HPAO-1 structure are superimposed onto one active site and shown as green mesh contoured to  $3.5\sigma$ .

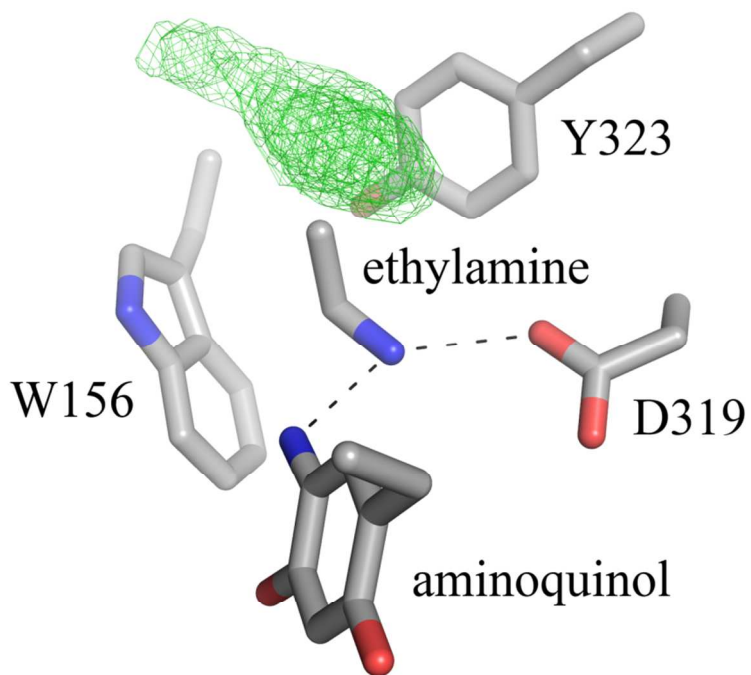

Supplement: NIHMS453574-supplement-1_si_001.pdf [file NIHMS453574-supplement-1_si_001.pdf]
